# Supplementary material for: Dietary Inflammatory Index and All-Cause Mortality in Older Adults with Hypertension: Results from NHANES
Source: MDPI journal article supplement (doi:10.3390/jcm12020506), 2023-01-07
Supplement: s1 [file s1]

# Supplementary method: The method of the calculation of Dietary Inflammatory Index

The Dietary Inflammatory Index (DII) calculation is standardized to a regionally representative world database which included daily dietary intake from 11 populations all over the world. Both standard mean and standard deviation were provided for all DII food parameters from the world database. For each food parameter, a z-score was created by subtracting the individual's estimated intake from the standard mean. This was then divided by the world standard deviation and then converted to a distribution centered on 0 with bounds between -1 and +1. This value was then multiplied by the inflammatory effect score for each food parameter which was then summed across all food parameters to create the overall DII score.

**Table S1.** The detail definition and classification of covariates.

| Variables        | Definitions or Classification                                                                                                                                                                                                                                                                                            |
|------------------|--------------------------------------------------------------------------------------------------------------------------------------------------------------------------------------------------------------------------------------------------------------------------------------------------------------------------|
| Sex              | Male, female.                                                                                                                                                                                                                                                                                                            |
| Race             | White, Black, Mexican, Hispanic, Other Races.                                                                                                                                                                                                                                                                            |
| Marital status   | Single: divorced, separated, widowed and never married;<br>Married or with partner: married and living with partner.                                                                                                                                                                                                     |
| Education        | < High school, High school, > High school.                                                                                                                                                                                                                                                                               |
| Smoking          | Never smoking: <100 cigarettes in lifetime;<br>Former smoking: >100 cigarettes in life and smoke not at all now;<br>Now smoking: >100 cigarettes in lifetime.                                                                                                                                                            |
| RIP              | When the ratio of family income to poverty is greater than or equal to 5, the value will be taken as 5.                                                                                                                                                                                                                  |
| Weight           | Normal: BMI < 25 kg/m <sup>2</sup> ;<br>Overweight: 25 ≤ BMI ≤ 30 kg/m <sup>2</sup> ;<br>Obese: BMI > 30 kg/m <sup>2</sup> .                                                                                                                                                                                             |
| Laboratory tests | The Specific method can be found in this webpage<br>( <a href="https://wwwn.cdc.gov/nchs/nhanes/continuousnhanes/labmethods.aspx?BeginYear=2017">https://wwwn.cdc.gov/nchs/nhanes/continuousnhanes/labmethods.aspx?BeginYear=2017</a> )                                                                                  |
| Sodium           | The intake of sodium was determined by means of two days of dietary interviews                                                                                                                                                                                                                                           |
| Potassium        | The intake of potassium was determined by means of two days of dietary interviews                                                                                                                                                                                                                                        |
| Hyperlipidemia   | Hypertriglyceridemia: TG ≥ 150mg/dl;<br>Hypercholesterolemia: TC ≥ 200mg/dl, LDL ≥ 130mg/dl;<br>Low HDL: HDL < 40mg/dl (male), 50mg/dl (female);<br>Use of lipid-lowering drugs.                                                                                                                                         |
| IFG              | 6.1 mmol/l ≤ Fasting glucose ≤ 7.0 mmol/l.                                                                                                                                                                                                                                                                               |
| IGT              | 7.8 mmol/l ≤ Two-hour OGTT blood glucose ≤ 11.1 mmol/l.                                                                                                                                                                                                                                                                  |
| Diabetes         | Self-reported doctor diagnosis of diabetes;<br>Glycohemoglobin HbA1c > 6.5%;<br>Fasting glucose ≥ 7.0 mmol/l;<br>Random blood glucose ≥ 11.1 mmol/l;<br>Two-hour OGTT blood glucose ≥ 11.1 mmol/l;<br>Use of diabetes medication or insulin.                                                                             |
| COPD             | FEV1/FVC < 0.7 Post-Bronchodilator;<br>Self-reported doctor diagnosis of emphysema;<br>Subjects who are older than 40 years, have a history of chronic bronchitis, and use the medications including selective phosphodiesterase-4 inhibitors, mast cell stabilizers, leukotriene modifiers and inhaled corticosteroids. |

Abbreviation: ratio of family income to poverty (RIP), impaired Fasting Glycaemia (IFG), impaired Glucose Tolerance (IGT), chronic obstructive pulmonary disease (COPD).

**Table S2.** Baseline characteristics according to all-cause mortality.

| Variable                         | Overall         | Alive (2060)    | Death (471)     | P-value |
|----------------------------------|-----------------|-----------------|-----------------|---------|
| Age, years                       | 73.06 ± 0.15    | 72.44 ± 0.16    | 76.16 ± 0.35    | < 0.001 |
| RIP                              | 2.98 ± 0.07     | 3.07 ± 0.07     | 2.54 ± 0.09     | < 0.001 |
| HbA1c, %                         | 6.04 ± 0.02     | 6.02 ± 0.02     | 6.15 ± 0.06     | 0.039   |
| ALT, IU/L                        | 21.66 ± 0.33    | 21.92 ± 0.36    | 20.36 ± 0.70    | 0.052   |
| AST, IU/L                        | 24.65 ± 0.32    | 24.37 ± 0.33    | 26.04 ± 0.67    | 0.018   |
| Cr, mg/dl                        | 1.03 ± 0.01     | 0.99 ± 0.01     | 1.20 ± 0.05     | < 0.001 |
| UA, mg/dl                        | 5.76 ± 0.04     | 5.74 ± 0.04     | 5.90 ± 0.10     | 0.138   |
| TG, mg/dl                        | 157.69 ± 2.74   | 157.86 ± 3.14   | 156.83 ± 6.55   | 0.892   |
| TC, mg/dl                        | 186.24 ± 1.33   | 187.42 ± 1.51   | 180.33 ± 2.56   | 0.021   |
| Sodium, mg/day                   | 3057.03 ± 36.85 | 3084.57 ± 42.89 | 2918.11 ± 74.40 | 0.07    |
| Potassium, mg/day                | 2573.34 ± 26.14 | 2596.08 ± 29.74 | 2458.65 ± 52.39 | 0.029   |
| eGFR, ml/min/1.73 m <sup>2</sup> | 68.73 ± 0.42    | 70.33 ± 0.47    | 60.65 ± 1.10    | < 0.001 |
| DII                              | 1.52 ± 0.05     | 1.46 ± 0.06     | 1.81 ± 0.10     | 0.005   |
| Sex, n (%)                       |                 |                 |                 | 0.455   |
| Male                             | 1208 (47.73)    | 957 (42.33)     | 251 (45.03)     |         |
| Female                           | 1323 (52.27)    | 1103 (57.67)    | 220 (54.97)     |         |
| Race, n (%)                      |                 |                 |                 | 0.092   |
| White                            | 1340 (52.94)    | 1033 (79.58)    | 307 (84.20)     |         |
| Black                            | 535 (21.14)     | 451 (8.26)      | 84 (7.39)       |         |
| Mexican                          | 214 (8.46)      | 186 (3.34)      | 28 (2.43)       |         |
| Hispanic                         | 228 (9.01)      | 202 (3.63)      | 26 (2.12)       |         |
| Other Races                      | 214 (8.46)      | 188 (5.20)      | 26 (3.87)       |         |
| Marital, n (%)                   |                 |                 |                 | < 0.001 |
| Single                           | 1136 (44.88)    | 880 (36.94)     | 256 (50.56)     |         |
| Married or with partner          | 1395 (55.12)    | 1180 (63.06)    | 215 (49.44)     |         |
| Education, n (%)                 |                 |                 |                 | 0.017   |
| < High school                    | 634 (25.05)     | 490 (15.68)     | 144 (22.69)     |         |
| High school                      | 627 (24.77)     | 504 (25.25)     | 123 (26.92)     |         |
| > High school                    | 1270 (50.18)    | 1066 (59.07)    | 204 (50.39)     |         |
| BMI, n (%)                       |                 |                 |                 | < 0.001 |
| Normal weight                    | 565 (22.32)     | 418 (19.46)     | 147 (29.58)     |         |
| Overweight                       | 924 (36.51)     | 771 (37.64)     | 153 (33.02)     |         |
| Obese                            | 1042 (41.17)    | 871 (42.90)     | 171 (37.40)     |         |
| Smoke, n (%)                     |                 |                 |                 | 0.068   |
| Never                            | 1240 (48.99)    | 1035 (49.83)    | 205 (43.53)     |         |
| Former                           | 1060 (41.88)    | 844 (43.90)     | 216 (47.67)     |         |
| Now                              | 231 (9.13)      | 181 (6.28)      | 50 (8.80)       |         |
| Hyperlipidemia, n (%)            |                 |                 |                 | 0.277   |
| No                               | 376 (14.86)     | 302 (12.02)     | 74 (14.21)      |         |
| Yes                              | 2155 (85.14)    | 1758 (87.98)    | 397 (85.79)     |         |
| Diabetes, n (%)                  |                 |                 |                 | < 0.001 |
| No                               | 1256 (49.62)    | 1054 (54.80)    | 202 (43.06)     |         |
| IFG                              | 162 (6.4)       | 138 (9.41)      | 24 (6.10)       |         |
| IGT                              | 124 (4.9)       | 92 (3.85)       | 32 (6.35)       |         |
| DM                               | 989 (39.08)     | 776 (31.94)     | 213 (44.49)     |         |
| COPD, n (%)                      |                 |                 |                 | < 0.001 |
| No                               | 2318 (91.58)    | 1915 (92.72)    | 403 (82.35)     |         |

| Yes | 213 (8.42) | 145 (7.28) | 68 (17.65) |
|-----|------------|------------|------------|
|-----|------------|------------|------------|

Abbreviation: ratio of family income to poverty (RIP), glycated hemoglobin (HbA1c), alanine aminotransferase (ALT), aspartate aminotransferase (AST), creatinine (Cr), uric acid (UA), triglyceride (TG), total cholesterol (TC), estimated glomerular filtration rate (eGFR), dietary inflammatory index (DII), body mass index (BMI), impaired fasting glycaemia (IFG), impaired glucose tolerance (IGT), diabetes (DM), chronic obstructive pulmonary disease (COPD).

**Table S3.** Univariate analysis of COX regression model.

| Variables                        | HR (95% CI)      | P-Value |
|----------------------------------|------------------|---------|
| Age, years                       | 1.14 (1.11,1.18) | <0.001  |
| RIP                              | 0.84 (0.77,0.91) | <0.001  |
| HbA1c, %                         | 1.17 (1.08,1.27) | <0.001  |
| ALT, IU/L                        | 0.98 (0.96,1.00) | 0.039   |
| AST, IU/L                        | 1.01 (1.00,1.02) | 0.015   |
| Cr, mg/dl                        | 1.34 (1.23,1.47) | <0.001  |
| UA, mg/dl                        | 1.07 (0.99,1.16) | 0.082   |
| TG, mg/dl                        | 1.00 (1.00,1.00) | 0.838   |
| TC, mg/dl                        | 1.00 (0.99,1.00) | 0.016   |
| Sodium, mg/day                   | 1.00 (1.00,1.00) | 0.098   |
| Potassium, mg/day                | 1.00 (1.00,1.00) | 0.014   |
| eGFR, ml/min/1.73 m <sup>2</sup> | 0.98 (0.97,0.98) | <0.001  |
| DII                              | 1.12 (1.05,1.19) | <0.001  |
| Sex, n (%)                       |                  |         |
| Male                             | 1.00             |         |
| Female                           | 0.94 (0.72,1.21) | 0.621   |
| Race, n (%)                      |                  |         |
| White                            | 1.00             |         |
| Black                            | 0.84 (0.65,1.09) | 0.188   |
| Mexican                          | 0.75 (0.49,1.15) | 0.193   |
| Hispanic                         | 0.59 (0.39,0.90) | 0.014   |
| Other Races                      | 0.75 (0.46,1.21) | 0.235   |
| Marital, n (%)                   |                  |         |
| Single                           | 1.00             |         |
| Married or with partner          | 0.59 (0.46,0.76) | <0.001  |
| Education, n (%)                 |                  |         |
| < High school                    | 1.00             |         |
| High school                      | 0.89 (0.59,1.34) | 0.573   |
| > High school                    | 0.70 (0.51,0.97) | 0.030   |
| BMI, n (%)                       |                  |         |
| Normal weight                    | 1.00             |         |
| Overweight                       | 0.65 (0.47,0.89) | 0.007   |
| Obese                            | 0.68 (0.50,0.91) | 0.009   |
| Smoke, n (%)                     |                  |         |
| Never                            | 1.00             |         |
| Former                           | 1.19 (0.94,1.50) | 0.146   |
| Now                              | 1.54 (1.02,2.32) | 0.039   |
| Hyperlipidemia, n (%)            |                  |         |
| No                               | 1.00             |         |
| Yes                              | 0.89 (0.65,1.21) | 0.463   |
| Diabetes, n (%)                  |                  |         |
| No                               | 1                |         |

|                    |                  |        |
|--------------------|------------------|--------|
| IFG                | 1.04 (0.68,1.60) | 0.854  |
| IGT                | 1.41 (0.83,2.41) | 0.202  |
| DM                 | 1.80 (1.36,2.38) | <0.001 |
| COPD, <i>n</i> (%) |                  |        |
| No                 | 1                |        |
| Yes                | 2.01 (1.47,2.75) | <0.001 |

Abbreviation: ratio of family income to poverty (RIP), glycated hemoglobin (HbA1c), alanine aminotransferase (ALT), aspartate aminotransferase (AST), creatinine (Cr), uric acid (UA), triglyceride (TG), total cholesterol (TC), estimated glomerular filtration rate (eGFR), dietary inflammatory index (DII), impaired fasting glycaemia (IFG), impaired glucose tolerance (IGT), diabetes (DM), chronic obstructive pulmonary disease (COPD).

**Table S4.** Association between DII and all-cause mortality among patients with hypertension after excluding participants who died within two years of follow-up (*n* = 2399).

| DII        | Model 1 HR (95% CI) | Model 2 HR (95% CI) | Model 3 HR (95% CI) |
|------------|---------------------|---------------------|---------------------|
| Continuous | 1.11 (1.03,1.20)    | 1.11 (1.02,1.20)    | 1.10 (1.01,1.20)    |
| DII < 0    | ref = 1.00          | ref = 1.00          | ref = 1.00          |
| DII > 1    | 1.66 (1.19,2.30)    | 1.70 (1.20,2.41)    | 1.75 (1.25,2.43)    |

Model 1: unadjusted. Model 2: adjust for sex, age, race, marital status, education, BMI, smoke and RIP. Model 3: adjust for sex, age, race, marital status, education, BMI, smoke, RIP, HbA1c, ALT, AST, Cr, TC, sodium, potassium, eGFR, DM and COPD.

**Table S5.** Association between DII and all-cause mortality in non-hypertensive population.

| DII        | Model 1 HR (95% CI) | Model 2 HR (95% CI) | Model 3 HR (95% CI) |
|------------|---------------------|---------------------|---------------------|
| Continuous | 1.04 (0.91,1.19)    | 1.05 (0.91,1.21)    | 1.02 (0.84,1.22)    |
| DII < 0    | Ref = 1.00          | ref = 1.00          | ref = 1.00          |
| DII > 1    | 1.61 (0.87,2.99)    | 1.48 (0.82,2.66)    | 1.56 (0.79,3.08)    |

The participants younger than 65 years old were firstly excluded (*N* = 33722). Then the participants diagnosed with hypertension and without survival status were excluded (*N* = 4036). Last, the participants without missing data (*N* = 869) were included for the analysis. Model 1: unadjusted. Model 2: adjust for sex, age, race, marital status, education, BMI, smoke and RIP. Model 3: adjust for sex, age, race, marital status, education, BMI, smoke, RIP, HbA1c, ALT, AST, Cr, TC, sodium, potassium, eGFR, DM and COPD.

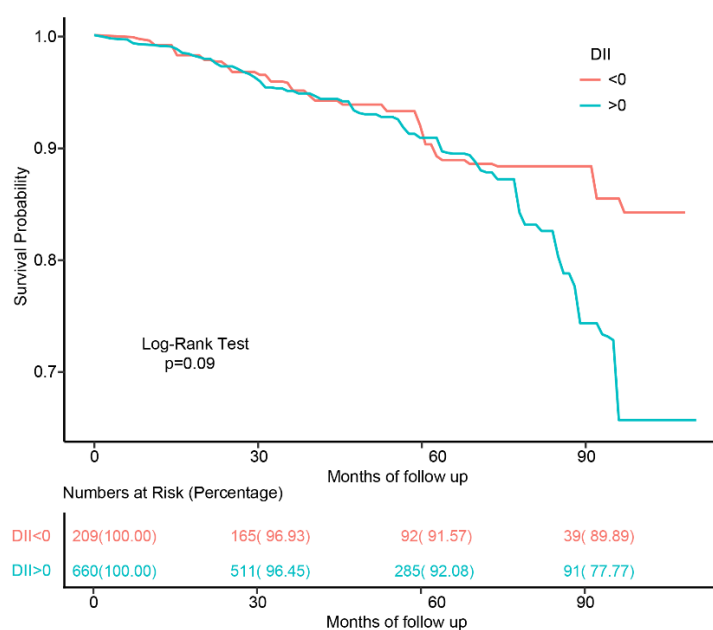

**Figure S1.** The Kaplan–Meier curve for all-cause mortality in non-hypertensive population with different diets.
